# Supplementary material
Source: publisher figshare collection journal article supplement (https://acs.figshare.com/ndownloader/files/4630186)

## Supporting Information

### Naturally Occurring Pentacyclic Triterpenes as Inhibitors of Glycogen Phosphorylase: Synthesis, Structure-Activity Relationships and X-ray Crystallographic Studies

Xiaoan Wen, Hongbin Sun, Jun Liu, Keguang Cheng, Pu Zhang, Liying Zhang, Jia Hao, Luyong  
Zhang, Peizhou Ni, Spyros E. Zographos, Demetres D. Leonidas, Kyra-Melinda Alexacou, Joseph  
M. Hayes, Thanasis Gimisis, Nikos G. Oikonomakos

#### Table of content:

Analytical data for the synthesized compounds (Table S1)  
Data collection and refinement statistics for compound **15** (Table S2)  
Data collection and refinement statistics for compound **3** (Table S3)  
Hydrogen bonding interactions for compound **15** (Table S4)  
Hydrogen bonding interactions for compound **3** (Table S5)  
Van der Waals interactions for compound **15** (Table S6)  
Van der Waals interactions for compound **3** (Table S7)  
Structures of AMP, W1807, Novo4j, AVE#21 (Figure S1)  
Comparison with Bayer compound W1807 (Figure S2)  
Comparison with Novo4j (Figure S3)  
Comparison with AVE#21 (Figure S4)  
Figure S5

Table S1<sup>a</sup>

| Compd.    | IR | MS<br>(m/z) | <sup>1</sup> HNMR | <sup>13</sup> CNMR | HRMS                                                            |          |
|-----------|----|-------------|-------------------|--------------------|-----------------------------------------------------------------|----------|
|           |    |             |                   |                    | Calcd.                                                          | Found    |
| <b>2</b>  | ✓  | 479 [M+Na]  | ✓                 |                    |                                                                 |          |
| <b>3</b>  | ✓  | 471 [M-H]   | ✓                 | ✓                  | C <sub>30</sub> H <sub>47</sub> O <sub>4</sub> [M-H]: 471.3474  | 471.3465 |
| <b>4</b>  | ✓  | 473 [M+H]   | ✓                 | ✓                  | C <sub>30</sub> H <sub>47</sub> O <sub>4</sub> [M-H]: 471.3474  | 471.3495 |
| <b>5</b>  | ✓  | 495 [M+Na]  | ✓                 | ✓                  | C <sub>30</sub> H <sub>47</sub> O <sub>4</sub> [M-H]: 471.3474  | 471.3470 |
| <b>6</b>  | ✓  | 453 [M-H]   | ✓                 |                    |                                                                 |          |
| <b>11</b> | ✓  | 479 [M+Na]  | ✓                 |                    |                                                                 |          |
| <b>12</b> | ✓  | 495 [M+Na]  | ✓                 | ✓                  | C <sub>30</sub> H <sub>47</sub> O <sub>4</sub> [M-H] : 471.3474 | 471.3453 |
| <b>13</b> | ✓  | 495 [M+Na]  | ✓                 | ✓                  | C <sub>30</sub> H <sub>47</sub> O <sub>4</sub> [M-H]: 471.3474  | 471.3485 |
| <b>14</b> | ✓  | 495 [M+Na]  | ✓                 | ✓                  | C <sub>30</sub> H <sub>47</sub> O <sub>4</sub> [M-H]: 471.3474  | 471.3481 |
| <b>17</b> | ✓  | 477 [M+Na]  | ✓                 |                    |                                                                 |          |
| <b>18</b> | ✓  | 641 [M+Na]  | ✓                 | ✓                  |                                                                 |          |
| <b>19</b> | ✓  | 641 [M+Na]  | ✓                 | ✓                  |                                                                 |          |
| <b>20</b> | ✓  | 657 [M+Na]  | ✓                 | ✓                  |                                                                 |          |
| <b>26</b> | ✓  | 569 [M+Na]  | ✓                 |                    |                                                                 |          |
| <b>27</b> | ✓  | 547 [M+H]   | ✓                 |                    |                                                                 |          |
| <b>28</b> | ✓  | 567 [M+Na]  | ✓                 |                    | C <sub>37</sub> H <sub>51</sub> O <sub>3</sub> [M-H]: 543.3838  | 543.3865 |
| <b>29</b> | ✓  | 567 [M+Na]  | ✓                 |                    | C <sub>37</sub> H <sub>51</sub> O <sub>3</sub> [M-H]: 543.3838  | 543.3851 |
| <b>32</b> | ✓  | 585 [M+Na]  | ✓                 |                    | C <sub>37</sub> H <sub>53</sub> O <sub>4</sub> [M-H]: 561.3944  | 561.3929 |
| <b>33</b> | ✓  | 585 [M+Na]  | ✓                 | ✓                  | C <sub>37</sub> H <sub>53</sub> O <sub>4</sub> [M-H]: 561.3944  | 561.3969 |
| <b>34</b> |    |             | ✓                 | ✓                  | C <sub>37</sub> H <sub>51</sub> O <sub>4</sub> [M-H]: 559.3787  | 559.3815 |
| <b>35</b> | ✓  | 561 [M+H]   | ✓                 | ✓                  | C <sub>37</sub> H <sub>51</sub> O <sub>4</sub> [M-H]: 559.3787  | 559.3811 |
| <b>36</b> | ✓  | 585 [M+Na]  | ✓                 | ✓                  | C <sub>37</sub> H <sub>53</sub> O <sub>4</sub> [M-H]: 561.3944  | 561.3962 |
| <b>37</b> | ✓  | 585 [M+Na]  | ✓                 | ✓                  | C <sub>37</sub> H <sub>53</sub> O <sub>4</sub> [M-H]: 561.3944  | 561.3964 |
| <b>38</b> | ✓  | 559 [M+H]   | ✓                 | ✓                  | C <sub>37</sub> H <sub>49</sub> O <sub>4</sub> [M-H]: 557.3631  | 557.3657 |
| <b>39</b> | ✓  | 559 [M+H]   | ✓                 | ✓                  | C <sub>37</sub> H <sub>49</sub> O <sub>4</sub> [M-H]: 557.3631  | 557.3651 |
| <b>40</b> | ✓  | 585 [M+Na]  | ✓                 | ✓                  | C <sub>37</sub> H <sub>53</sub> O <sub>4</sub> [M-H]: 561.3944  | 561.3971 |
| <b>41</b> | ✓  | 585 [M+Na]  | ✓                 | ✓                  | C <sub>37</sub> H <sub>53</sub> O <sub>4</sub> [M-H]: 561.3944  | 561.3959 |
| <b>42</b> | ✓  | 561 [M+H]   | ✓                 | ✓                  | C <sub>37</sub> H <sub>51</sub> O <sub>4</sub> [M-H]: 559.3787  | 557.3808 |
| <b>43</b> | ✓  | 569 [M+Na]  | ✓                 |                    |                                                                 |          |
| <b>44</b> | ✓  | 569 [M+Na]  | ✓                 |                    |                                                                 |          |
| <b>46</b> | ✓  | 809 [M+Na]  | ✓                 | ✓                  |                                                                 |          |

|           |   |            |   |   |  |  |
|-----------|---|------------|---|---|--|--|
| <b>47</b> | ✓ | 809 [M+Na] | ✓ | ✓ |  |  |
| <b>48</b> | ✓ | 825 [M+Na] | ✓ | ✓ |  |  |

<sup>a</sup> The target compounds **2-6**, **11-14** and **17-20** are all known naturally occurring products, and their analytical data was identical with the reported data (see experimental). Typically, purities were >98%.

**Table S2**

**Summary of diffraction data and refinement statistics for the GPb-Asiatic Acid complex**

|                                                         |                                    |
|---------------------------------------------------------|------------------------------------|
| Experiment                                              | 10 mM Asiatic Acid (7 h)           |
| Space group                                             | $P4_32_12$                         |
| No. of images (°)                                       | 80 (0.8) <sup>1</sup>              |
| Unit cell dimensions (Å)                                | a=b=128.72, c=116.64               |
| Resolution range (Å)                                    | 30 – 2.4                           |
| No. of observations                                     | 779188                             |
| No. of unique reflections                               | 38832                              |
| <I/σ(I)> (outermost shell) <sup>2</sup>                 | 15.5 (4.2)                         |
| Completeness (outermost shell) (%)                      | 100 (99.9)                         |
| R <sub>m</sub> (outermost shell) <sup>3</sup>           | 0.070 (0.471)                      |
| Outermost shell (Å)                                     | 2.44-2.40                          |
| Redundancy (outermost shell)                            | 5.3<br>(5.4)                       |
| Refinement (resolution) (Å)                             | 90.91 – 2.40                       |
| No of reflections used (free)                           | 36836 (1942)                       |
| Residues included                                       | (12-254), (261-317), (324-836)     |
| No of protein atoms                                     | 6623                               |
| No of water molecules                                   | 198                                |
| No of ligand atoms                                      | 15 (PLP),<br>35 (Asiatic acid)     |
| R (outermost shell) (%)                                 | 17.9 (22.6)                        |
| (R <sub>free</sub> ) <sup>4</sup> (outermost shell) (%) | 20.8 (30.7)                        |
| Outermost shell in refinement (Å)                       | 2.46-2.40                          |
| r.m.s.d. in bond lengths (Å)                            | 0.008                              |
| r.m.s.d. in bond angles (°)                             | 1.13                               |
| Average B (Å <sup>2</sup> ) for residues                | (12-254), (261-317), (324-836)     |
| Overall                                                 | 40.1                               |
| Main chain                                              | 39.4                               |
| Side chain                                              | 40.8                               |
| Average B (Å <sup>2</sup> ) for ligands                 | 27.8 (PLP),<br>80.7 (Asiatic acid) |
| Average B (Å <sup>2</sup> ) for Water molecules         | 38.5                               |

<sup>1</sup> 0.8 is the rotation range per image

<sup>2</sup> σ(I) is the standard deviation of I.

<sup>3</sup> $R_{\text{merge}} = \sum_i \sum_h | \langle I_h \rangle - I_{ih} | / \sum_i \sum_h I_{ih}$ , where  $\langle I_h \rangle$  and  $I_{ih}$  are the mean and  $i$ th measurement of intensity for reflection  $h$ , respectively.

<sup>4</sup>Crystallographic  $R = \sum | |F_o| - |F_c| | / \sum |F_o|$ , where  $|F_o|$  and  $|F_c|$  are the observed and calculated structure factor amplitudes, respectively.  $R_{\text{free}}$  is the corresponding  $R$  value for a randomly chosen 5% of the reflections that were not included in the refinement.

**Table S3**

| <b>Summary of diffraction data and refinement statistics for the GPb-Maslinic Acid complex</b> |                                     |
|------------------------------------------------------------------------------------------------|-------------------------------------|
| Experiment                                                                                     | 10 mM Maslinic Acid (7 h)           |
| Space group                                                                                    | $P4_32_12$                          |
| No. of images ( $^\circ$ )                                                                     | 80 (0.8) <sup>1</sup>               |
| Unit cell dimensions ( $\text{\AA}$ )                                                          | a=b=128.72, c=116.70                |
| Resolution range ( $\text{\AA}$ )                                                              | 30 – 2.7                            |
| No. of observations                                                                            | 795136                              |
| No. of unique reflections                                                                      | 27542                               |
| $\langle I/\sigma(I) \rangle$ (outermost shell) <sup>2</sup>                                   | 17.2 (4.2)                          |
| Completeness (outermost shell) (%)                                                             | 99.8 (99.7)                         |
| $R_m$ (outermost shell) <sup>3</sup>                                                           | 0.077 (0.492)                       |
| Outermost shell ( $\text{\AA}$ )                                                               | 2.75-2.70                           |
| Redundancy (outermost shell)                                                                   | 5.3 (5.4)                           |
| Refinement (resolution) ( $\text{\AA}$ )                                                       | 90.91 – 2.70                        |
| No of reflections used (free)                                                                  | 26130 (1383)                        |
| Residues included                                                                              | (12-254), (261-317), (324-836)      |
| No of protein atoms                                                                            | 6623                                |
| No of water molecules                                                                          | 129                                 |
| No of ligand atoms                                                                             | 15 (PLP),<br>34 (Maslinic acid)     |
| $R$ (outermost shell) (%)                                                                      | 16.7 (23.7)                         |
| $(R_{\text{free}})^4$ (outermost shell) (%)                                                    | 22.3 (31.1)                         |
| Outermost shell in refinement ( $\text{\AA}$ )                                                 | 2.77-2.70                           |
| r.m.s.d. in bond lengths ( $\text{\AA}$ )                                                      | 0.009                               |
| r.m.s.d. in bond angles ( $^\circ$ )                                                           | 1.18                                |
| Average $B$ ( $\text{\AA}^2$ ) for residues                                                    | (12-254), (261-317), (324-836)      |
| Overall                                                                                        | 42.2                                |
| Main chain                                                                                     | 41.6                                |
| Side chain                                                                                     | 42.9                                |
| Average $B$ ( $\text{\AA}^2$ ) for ligands                                                     | 29.8 (PLP),<br>82.7 (Maslinic acid) |
| Average $B$ ( $\text{\AA}^2$ ) for Water molecules                                             | 36.5                                |

<sup>1</sup> 0.8 is the rotation range per image

<sup>2</sup>  $\sigma(I)$  is the standard deviation of  $I$ .

<sup>3</sup>  $R_{\text{merge}} = \sum_i \sum_h | \langle I_h \rangle - I_{ih} | / \sum_i \sum_h I_{ih}$ , where  $\langle I_h \rangle$  and  $I_{ih}$  are the mean and  $i$ th measurement of intensity for reflection  $h$ , respectively.

<sup>4</sup> Crystallographic  $R = \sum | |F_o| - |F_c| | / \sum |F_o|$ , where  $|F_o|$  and  $|F_c|$  are the observed and calculated structure factor amplitudes, respectively.  $R_{\text{free}}$  is the corresponding  $R$  value for a randomly chosen 5% of the reflections that were not included in the refinement.

**Table S4**

| <b>Hydrogen bond interactions between Asiatic acid and GPb residues at the allosteric site</b> |                     |                     |
|------------------------------------------------------------------------------------------------|---------------------|---------------------|
| <b>Inhibitor atom</b>                                                                          | <b>Protein atom</b> | <b>Distance (Å)</b> |
| <b>O3</b>                                                                                      | Gln72 NE2           | 2.8                 |
|                                                                                                | Asp42' OD2          | 2.7                 |
| <b>O29</b>                                                                                     | Arg310 NE           | 3.2                 |
|                                                                                                | Arg310 NH1          | 2.7                 |
| <b>O28</b>                                                                                     | Arg310 NE           | 2.8                 |
| <b>O23</b>                                                                                     | Asp42' OD1          | 2.9                 |

**Table S5**

| <b>Hydrogen bond interactions between Maslinic acid and GPb residues at the allosteric site</b> |                     |                     |
|-------------------------------------------------------------------------------------------------|---------------------|---------------------|
| <b>Inhibitor atom</b>                                                                           | <b>Protein atom</b> | <b>Distance (Å)</b> |
| <b>O3</b>                                                                                       | Gln72 NE2           | 2.8                 |
|                                                                                                 | Asp42' OD2          | 2.7                 |
| <b>O29</b>                                                                                      | Arg310 NH1          | 2.7                 |
| <b>O28</b>                                                                                      | Arg310 NE           | 2.8                 |

**Table S6****Van der Waals interactions between Asiatic acid and GPb residues at the allosteric site**

| Inhibitor atom | Protein atom                            | No of contacts |
|----------------|-----------------------------------------|----------------|
| <b>O3</b>      | Gln72 CD,OE1; Asp42' CG,OD1; Asn44' ND2 | 5              |
| <b>C3</b>      | Gln72 NE2; Asp42' OD1,OD2               | 3              |
| <b>C2</b>      | Gln72 CD,OE1,NE2                        | 3              |
| <b>O2</b>      | Gln72 OE1                               | 1              |
| <b>C1</b>      | Val45' CG1                              | 1              |
| <b>C25</b>     | Gln71 O,C; Tyr75 CB                     | 3              |
| <b>C11</b>     | Tyr75 CD1                               | 1              |
| <b>C21</b>     | Arg309 CZ,NH2                           | 2              |
| <b>C22</b>     | Arg309 NH2                              | 1              |
| <b>C28</b>     | Arg310 NE,NH1,CZ                        | 3              |
| <b>O29</b>     | Arg310 CZ                               | 1              |
| <b>O28</b>     | Arg310 NH1,CG,CD,CZ; Wat102             | 5              |
| <b>C26</b>     | Wat102                                  | 1              |
| <b>C16</b>     | Phe196 CZ                               | 1              |
| <b>C5</b>      | Val45' CG1                              | 1              |
| <b>C24</b>     | Ile68 CG2,O; Gln72 N,CA,CB,NE2          | 6              |
| <b>C23</b>     | Ile68 CG2; Asp42' CG,OD1,OD2            | 4              |
| <b>O23</b>     | Asp42' N,CG,OD2; Val45'CB,CG1,CG2       | 6              |
| <b>Total</b>   |                                         | <b>48</b>      |

**Table S7****Van der Waals interactions between Maslinic acid and GPb residues at the allosteric site**

| Inhibitor atom | Protein atom                            | No of contacts |
|----------------|-----------------------------------------|----------------|
| <b>O3</b>      | Gln72 CD,OE1; Asp42' CG,OD1; Asn44' ND2 | 5              |
| <b>C3</b>      | Gln72 NE2; Asp42' OD1,OD2               | 3              |
| <b>C2</b>      | Gln72 OE1                               | 1              |
| <b>O2</b>      | Gln72 OE1                               | 1              |
| <b>C1</b>      | Val45' CG1                              | 1              |
| <b>C25</b>     | Gln71 O,C                               | 2              |
| <b>C21</b>     | Arg309 CZ,NH1,NH2                       | 3              |
| <b>C22</b>     | Arg309 NH2                              | 1              |
| <b>C28</b>     | Arg310 NE,NH1,CZ                        | 3              |
| <b>O29</b>     | Arg242 CZ,NH1,NH2; Arg310 NE,CZ         | 5              |
| <b>O28</b>     | Arg310 NH1,CG,CD,CZ                     | 3              |
| <b>C16</b>     | Phe196 CE1,CZ,CE2                       | 3              |
| <b>C5</b>      | Val45' CG1                              | 1              |
| <b>C24</b>     | Ile68 O; Gln72 N,NE2                    | 3              |
| <b>C23</b>     | Asp42' CG,OD1,OD2; Val45' CG2           | 4              |
| <b>C29</b>     | Arg309 CG                               | 1              |
| <b>Total</b>   |                                         | <b>40</b>      |



**Figure S1**

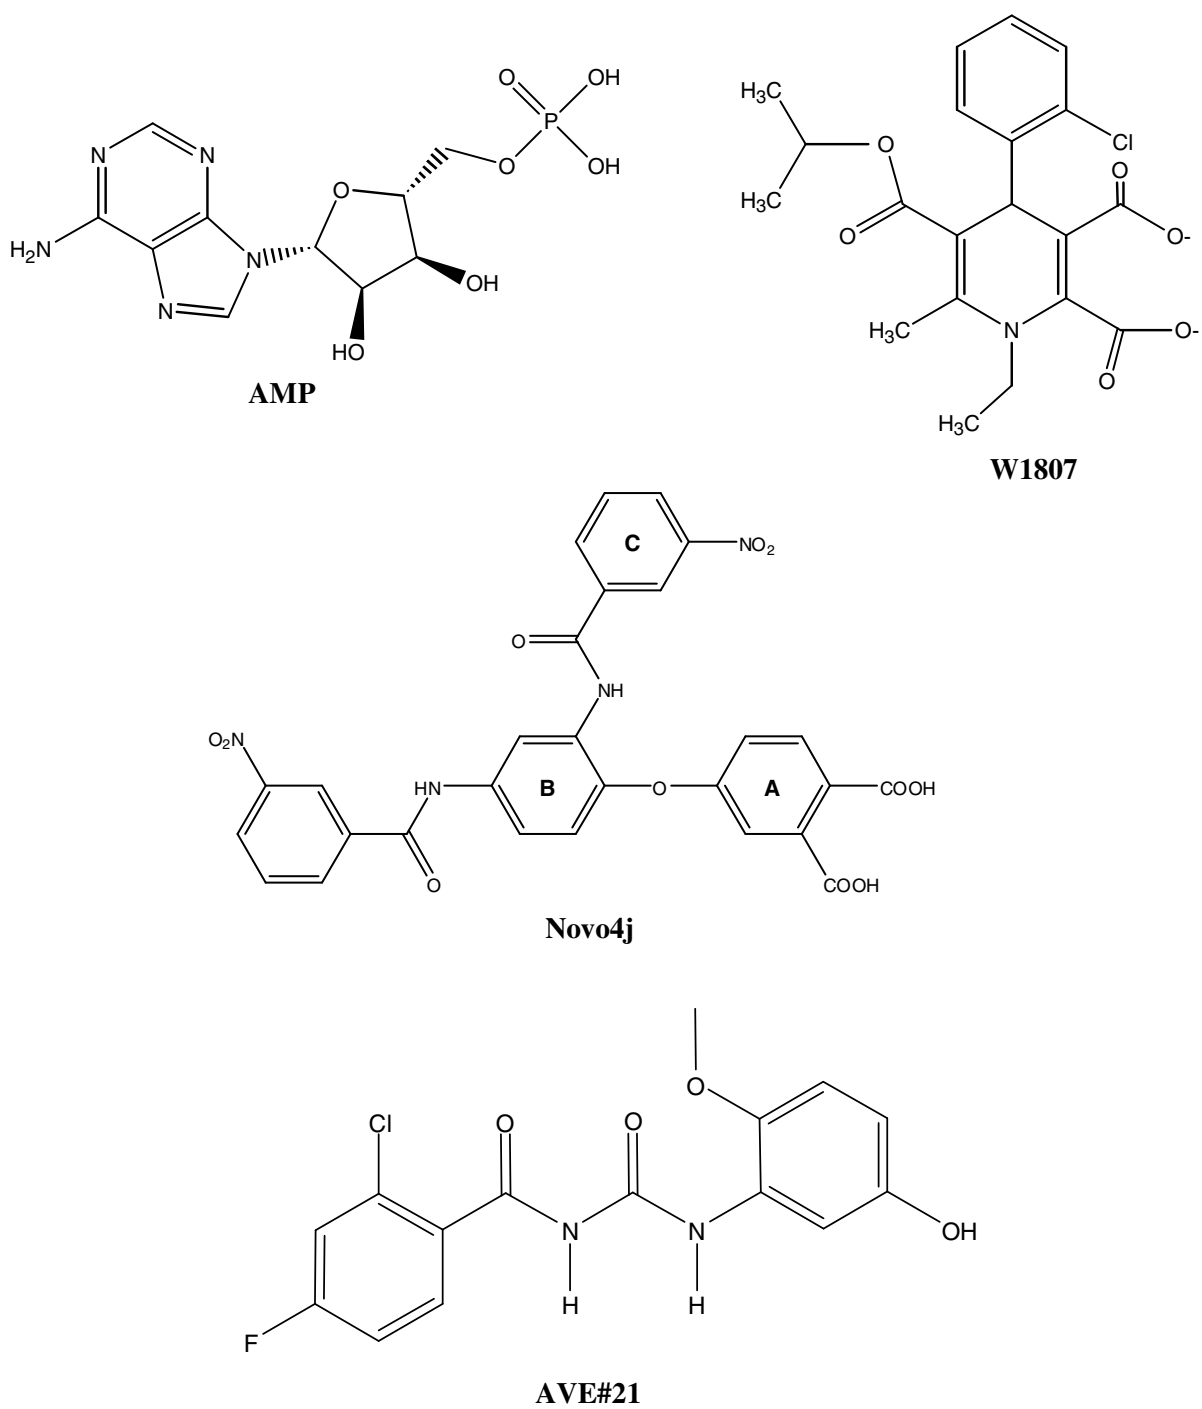

**Comparison with 1-(2-chloro-4-fluorobenzoyl)-3-(5-hydroxy-2-methoxy-phenyl) urea (Bayer compound W1807).**

Bayer compound W1807 is the most potent inhibitor of rabbit muscle GP known to date ( $K_i = 1.6$  nM for GPb and  $K_i = 10.8$  nM for GPa). Superposition of the complex structures of GPb-**15** and GPb-W1807 (Figure S2) reveals that W1807 partially overlaps with **15**. The 1,4-hydroxy-2-methyl-3-carboxylate-pyridine ring superimposes onto **B** and **C** rings; the two carboxylates of W1807 exploit the allosteric effector phosphate recognition site and are close to the carboxylate oxygens O23 and O24 of **15**; the chlorophenyl group of W1807 is oriented almost perpendicular to the **C** ring. Compound **15** makes hydrogen bonding interactions with one arginine (Arg310), and a few nonpolar van der Waals interactions to Tyr75, Phe196, and Val45'. In contrast, the contacts from W1807 to GPb are dominated by nonpolar van der Waals interactions (to Val45', Trp67, Ile68, Tyr75 and interactions from the ( $\delta^- \pi$ ) electron cloud of the chlorophenyl ring to the ( $\delta^+$ ) hydrogen atoms on the Phe196) and also by ionic interactions from the carboxylate groups to three arginine residues (Arg242, Arg309, and Arg310). This may explain why W1807 is a much more potent inhibitor than **15**.

**Figure S2** Comparison between GPb-asiatic acid complex (shown in green-subunit 1 and orange-subunit 2) and T-state GPb-W1807 (shown in mauve-subunit 1 and cyan-subunit 2).

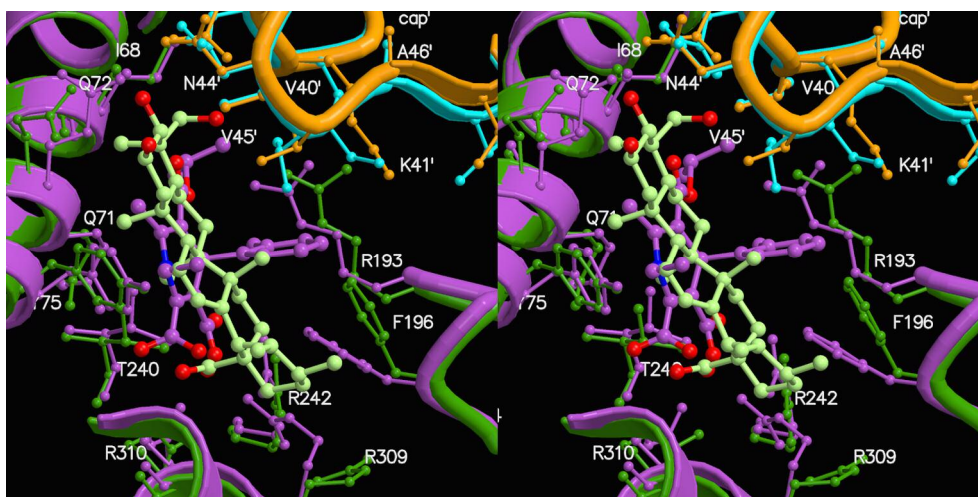

### Comparison with 4-[2,4-bis-(3-nitrobenzoylamino)phenoxy]phthalic acid (Novo4j)

4-[2,4-Bis-(3-nitrobenzoylamino)phenoxy]phthalic acid (**Novo4j**) was found to be a potent inhibitor of pig liver GP<sub>a</sub> (with an IC<sub>50</sub> value of 74 nM) that also binds at the allosteric site of the rabbit muscle enzyme. Compound **Novo4j**, on binding to GP<sub>b</sub>, induces conformational changes to the enzyme and stabilises a conformation similar to that of GP<sub>b</sub>-**15**. The structural comparison of GP<sub>b</sub>-**Novo4j** and GP<sub>b</sub>-**15** complexes shows (Figure S3) that rings **A** and **B** of **Novo4j** overlap with rings **A-D** and the carboxylate of **15**, while the two 3-nitrobenzoylamino groups of **Novo4j** fit the space available in the allosteric site are directed towards the narrow side pocket of the AMP site (between Trp67 and Arg193) and to the entrance of the AMP site (Asp42', Gln44' and Gln72), respectively, and do not overlap with **15**.

**Figure S3.** Comparison between GP<sub>b</sub>-asiatic acid complex (shown in green-subunit 1 and orange-subunit 2) and T-state GP<sub>b</sub>-novo4j (shown in mauve-subunit 1 and cyan-subunit 2).

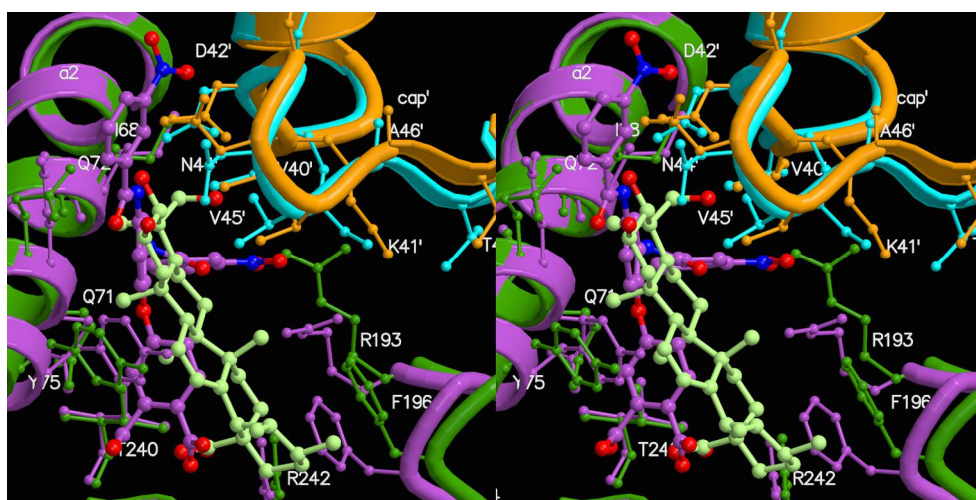

### Comparison with 1-(2-chloro-4-fluorobenzoyl)-3-(5-hydroxy-2-methoxy-phenyl) urea (AVE#21)

Compound **AVE#21**, with an enzymic activity of  $IC_{50}=23 (\pm 1)$  nM, is one of the most potent inhibitors of human liver glycogen phosphorylase (hlGPa) that binds at the allosteric site. The compound binds with 2-chloro-4-fluoro-substituted benzoyl ring buried deep in the allosteric site and tightly packs against Trp67, Arg193, Val40', and Lys41'; the central acyl urea moiety makes hydrogen bonding interactions with the carbonyl group of Val40', the backbone amide group of Asp42', and an ordered water molecule in the upper part of the AMP pocket; the phenolic ring, which points toward the entrance of the site, makes hydrogen bonds with Asp42' and Asn44' and makes additional van der Waals interactions with Tyr75 through the methoxy substituent. These interactions may provide an explanation for the high potency of **AVE#21**. The superposition of the structure of the hlGPa-**AVE#21** complex with GPb-**15** complex shows (Figure S4). The 5-hydroxy-2-methoxy-phenyl ring overlaps mostly with **A** ring and only partially with **B** ring of compound **15**, while the 2-chloro-4-fluoro-substituted benzoyl ring of **AVE#21** do not overlap with **15**.

**Figure S4.** Comparison between GPb-asiatic acid complex (shown in green-subunit 1 and orange-subunit 2) and T-state hlGPa-AVE#21 (shown in mauve-subunit 1 and cyan-subunit 2).

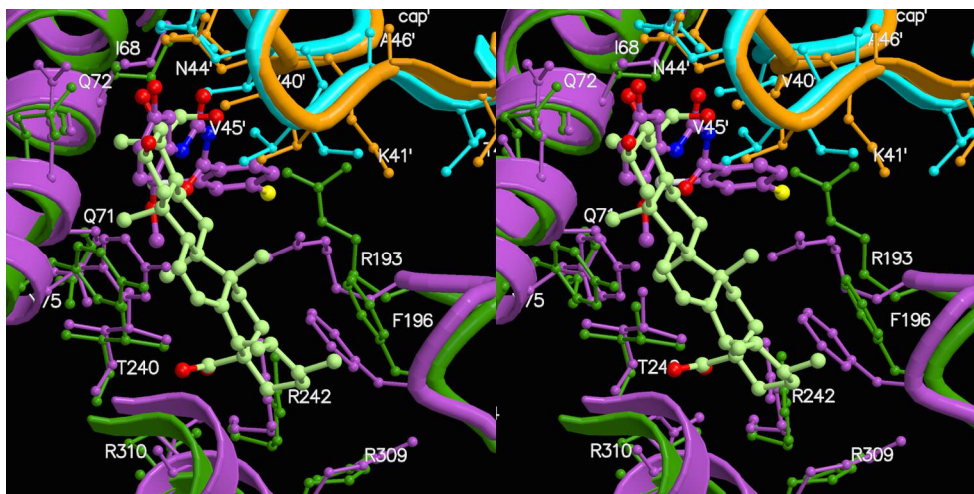

**Figure S5.** Comparison of the position of the asiatic acid as compared to those of AMP (a), W1807 (b), **novo4j** (c), and **AVE#21** (d), after superimposing the corresponding complex structures onto the GPb-asiatic acid complex structure.

(a)

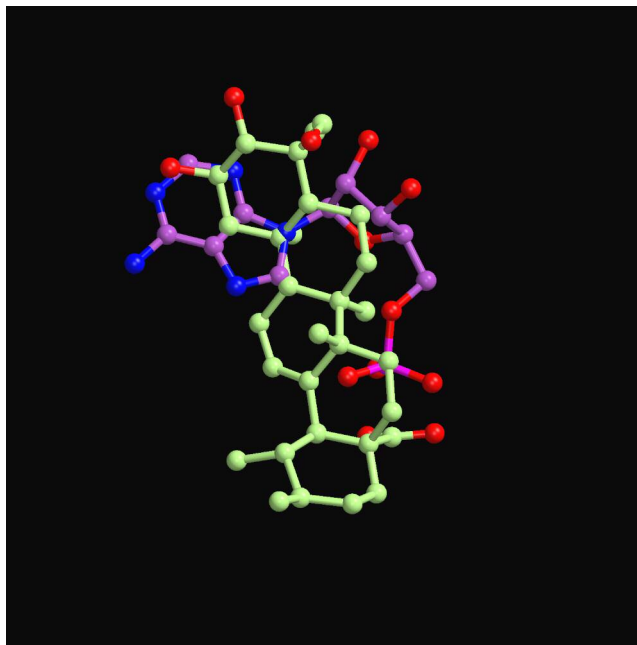

(b)

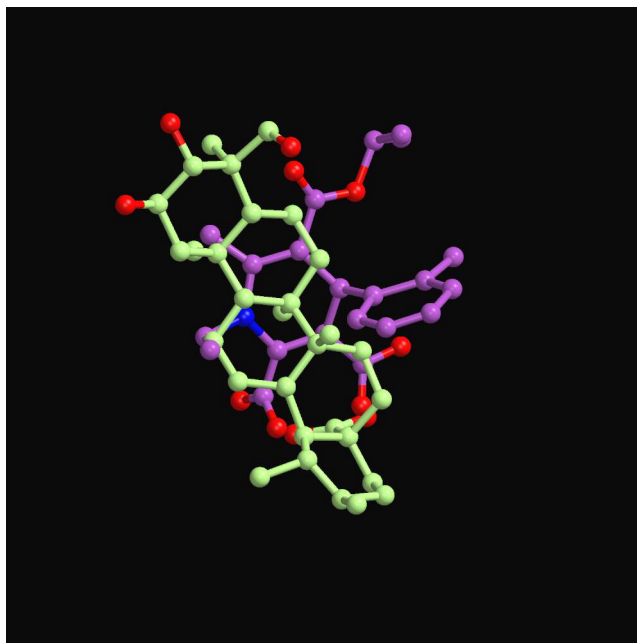

(c)

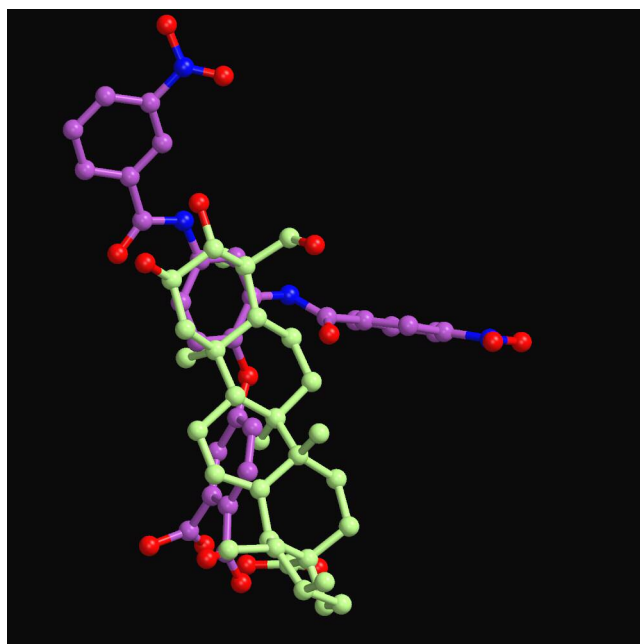

(d)

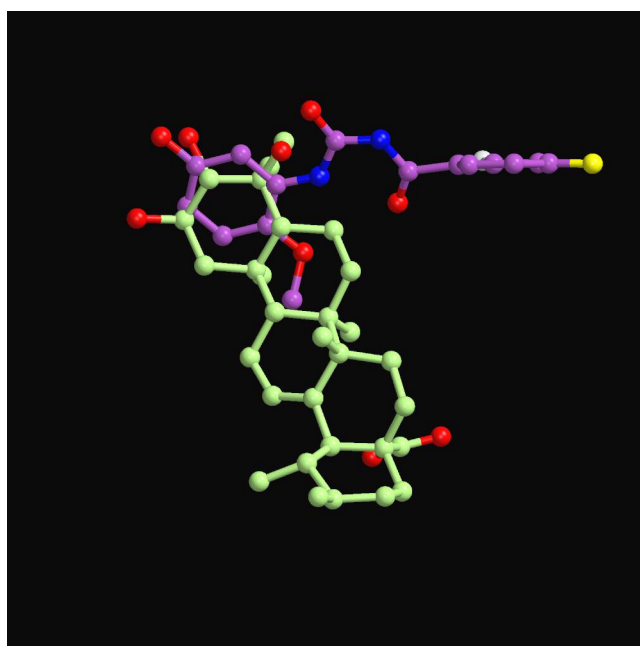

Supplement: Supplementary file 1 [file 4630186]
